CORRECTION

# Correction: First evidence of biogenic habitat from tubeworms providing a near-absolute habitat requirement for high-intertidal *Ulva* macroalgae

Kiran Liversage

There is text missing from [Fig 4](#). Please see the correct [Fig 4](#) here.

There is an error in the caption for [Fig 6](#). Please see the correct [Fig 6](#) caption here.

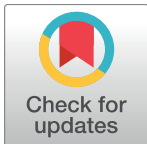

## OPEN ACCESS

**Citation:** Liversage K (2018) Correction: First evidence of biogenic habitat from tubeworms providing a near-absolute habitat requirement for high-intertidal *Ulva* macroalgae. PLoS ONE 13(2): e0192579. <https://doi.org/10.1371/journal.pone.0192579>

**Published:** February 5, 2018

**Copyright:** © 2018 Kiran Liversage. This is an open access article distributed under the terms of the [Creative Commons Attribution License](#), which permits unrestricted use, distribution, and reproduction in any medium, provided the original author and source are credited.

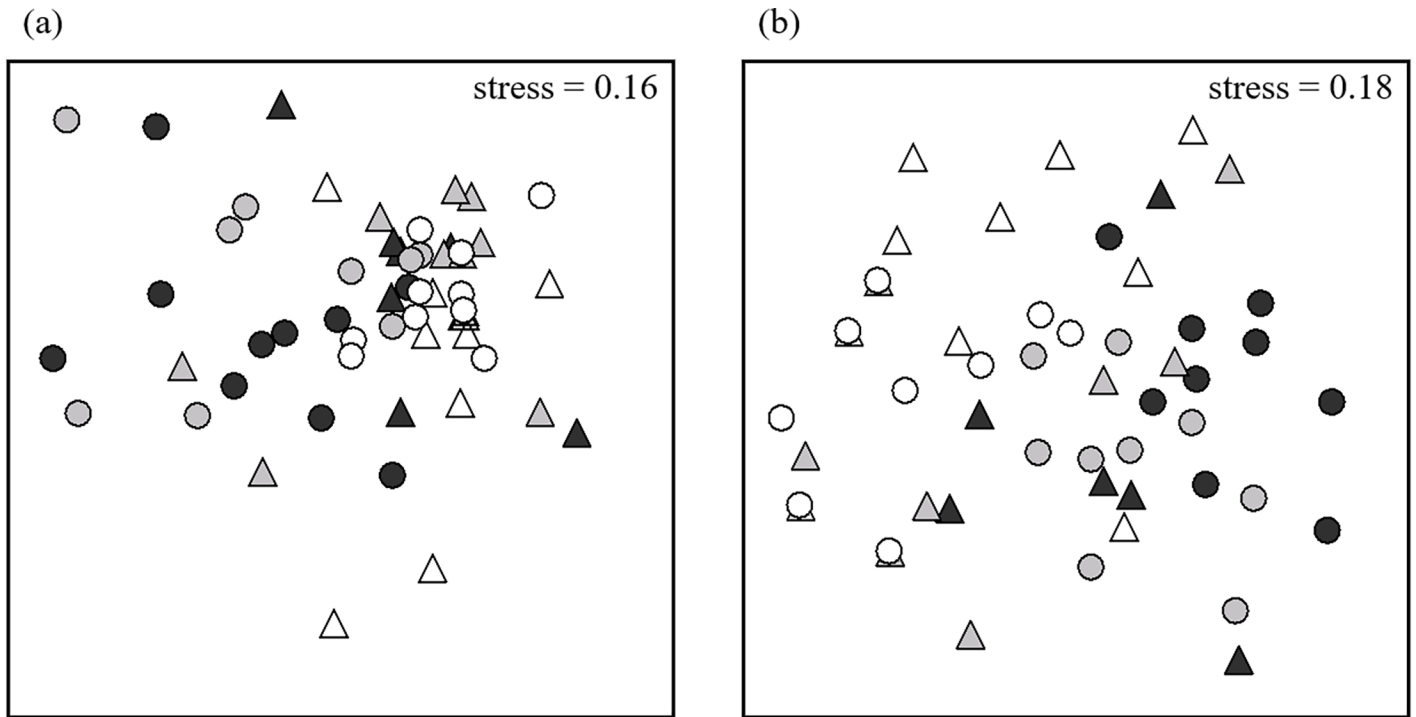

Site 1 (dark grey): with tubes  $\neq$  without tubes  
 Site 2 (light grey): with tubes  $\neq$  without tubes  
 Site 3 (white): with tubes = without tubes

Site 1 (dark grey): with tubes  $\neq$  without tubes  
 Site 2 (light grey): with tubes = without tubes  
 Site 3 (white): with tubes = without tubes

**Fig 4. Associations of grazer assemblages with worm-tubes vary according to random sites.** nMDS plots of (a) densities, and (b) numbers per boulder, of mobile assemblages (grazers) on boulders with serpulimorph tubes (triangle) and without (circle). Dark grey symbols are from Site 1, light grey from Site 2, and white from Site 3. Results from PERMANOVA pairwise tests are shown under the plots;  $n = 10$ .

<https://doi.org/10.1371/journal.pone.0192579.g001>

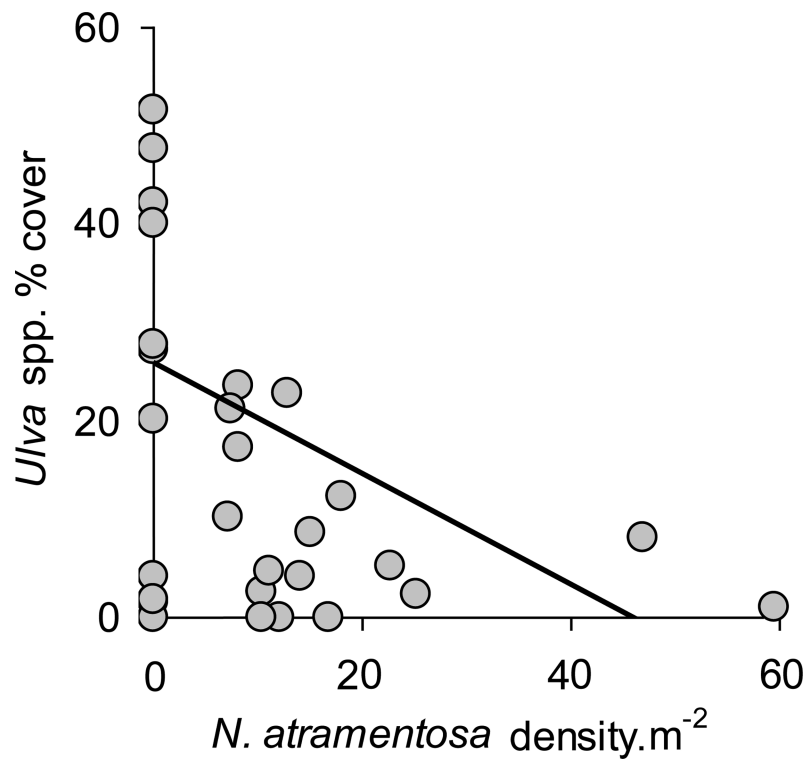

**Fig 6. Density of the grazer *Nerita atramentosa* is negatively correlated with *Ulva* algae cover.** Correlation between density of the grazer *N. atramentosa* and cover of *Ulva* (arcsine transformed; [49]) on boulders which had serpulimorph tubes. Linear regression was used to visually represent the result from the permutational ANCOVA. Data were pooled from three random sites;  $n = 10$ .

<https://doi.org/10.1371/journal.pone.0192579.g002>

## Reference

1. Liversage K (2017) First evidence of biogenic habitat from tubeworms providing a near-absolute habitat requirement for high-intertidal *Ulva* macroalgae. PLoS ONE 12(5): e0176952. <https://doi.org/10.1371/journal.pone.0176952> PMID: 28467512
